# Supplementary material
Source: publisher site journal article supplement (https://www.dovepress.com/article/589185)
Supplement: Supplementary file 1 [file 589185_Supplementary%20material.pdf]

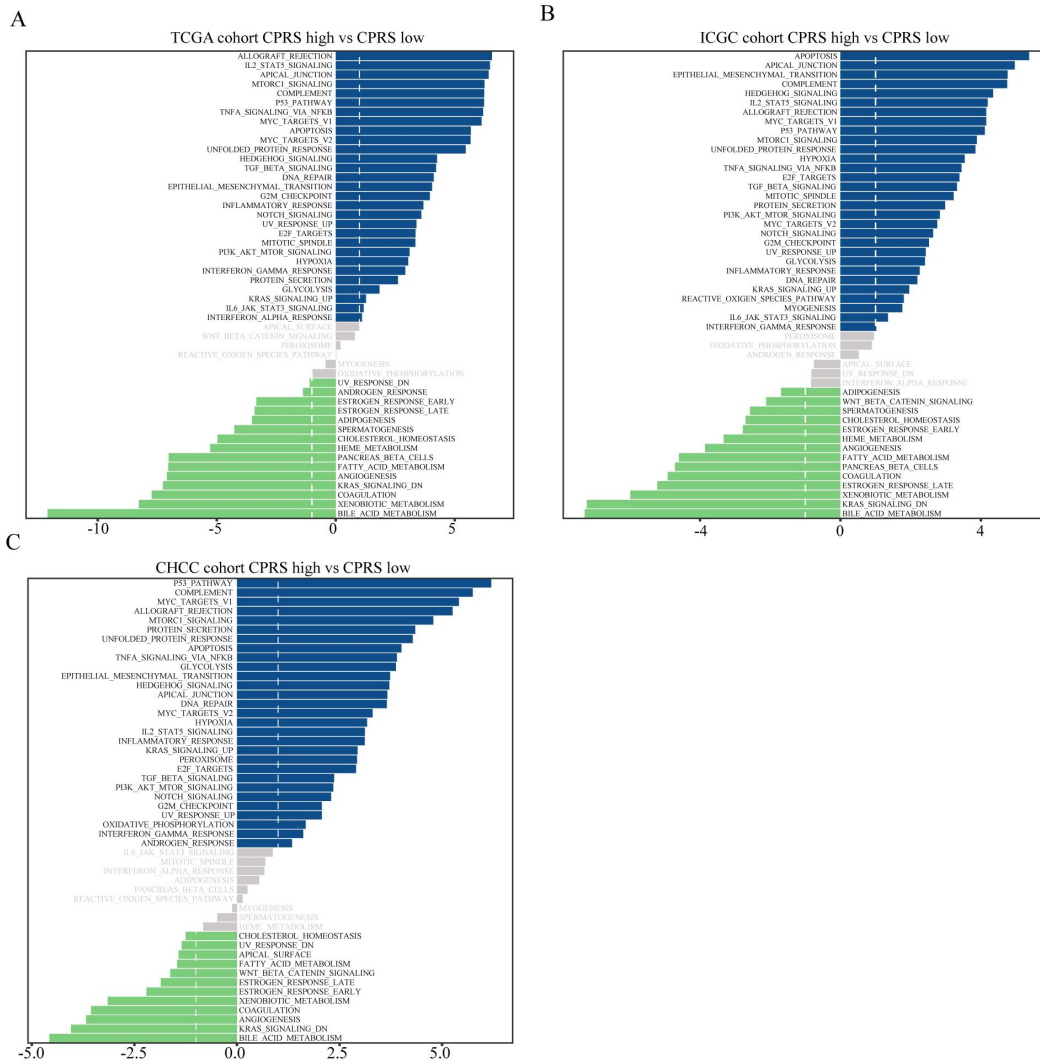

**Supplementary Figure1: Pathway Characteristics of CPRS.**

(A-C) Gene Set Variation Analysis (GSVA) comparing high- and low-CPRS patients.

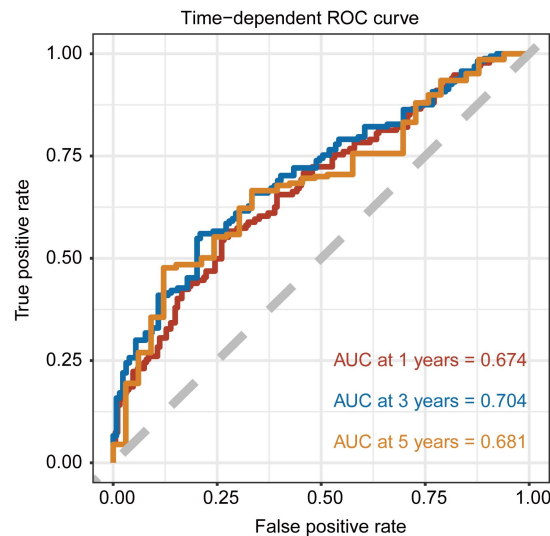

**Supplementary Figure2:**The time-dependent ROC curve analysis for the CPRS in

predicting progression-free survival (PFS) among HCC patients in the TCGA-LIHC cohort.

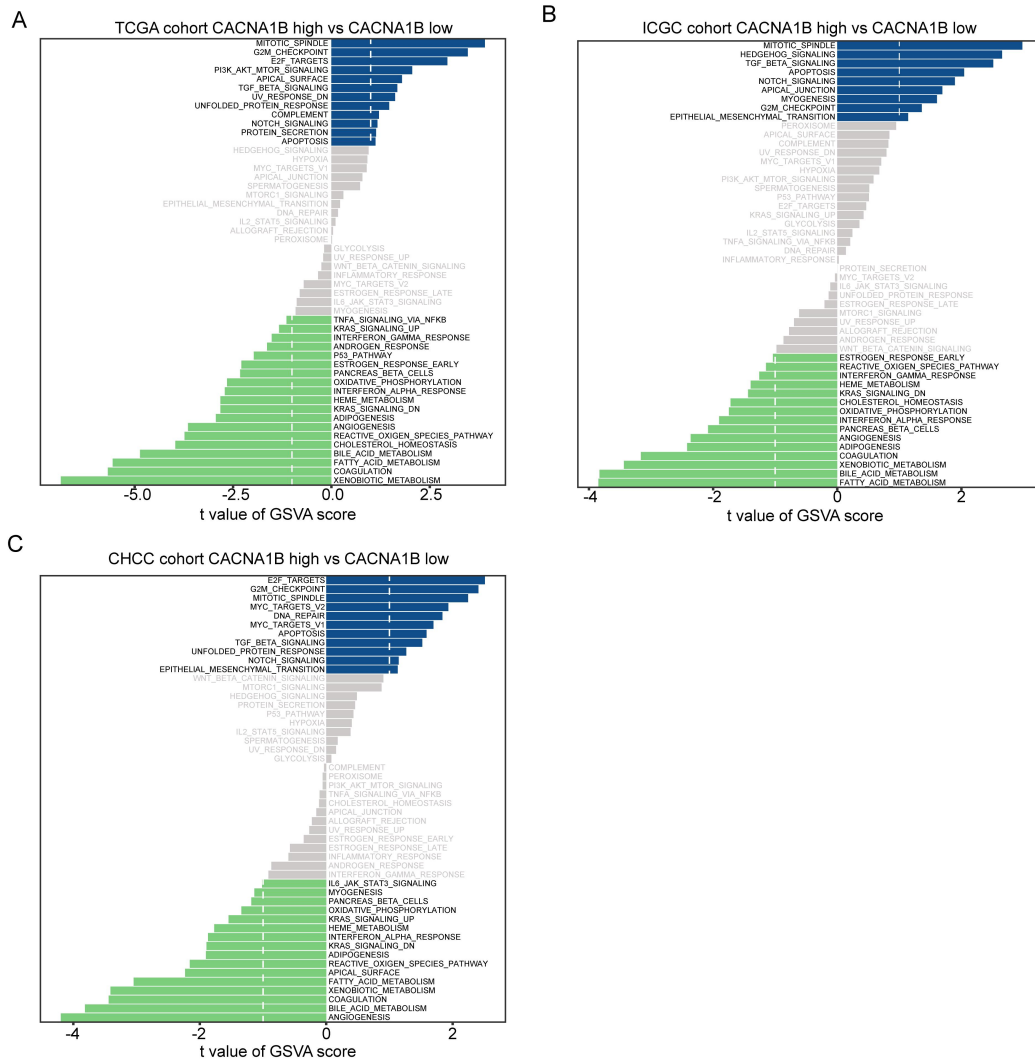

**Supplementary Figure3:** Gene Set Variation Analysis (GSVA) comparing CACNA1B-high and CACNA1B-low groups across the TCGA(A), ICGC(B), and CHCC cohorts(C).

**Supplementary table1.The baseline clinical characteristics of CHCC cohort**

| <b>Characteristic</b>       | <b>N = 159<sup>a</sup></b> |
|-----------------------------|----------------------------|
| Gender (male)               | 128 (81%)                  |
| PFStime(months)             | 23 (7, 37)                 |
| Ostime(months)              | 34 (22, 44)                |
| PFS(yes)                    | 80 (50%)                   |
| OS(dead)                    | 56 (35%)                   |
| Liver.cirrhosis(yes)        | 112 (70%)                  |
| Tumor.size(cm)              | 5.5 (3.5, 9.0)             |
| Lymph.node.metastasis(yes)  | 2 (1.3%)                   |
| Tumor.thrombus(yes)         | 37 (23%)                   |
| Tumour.enapsulation(yes)    | 111 (70%)                  |
| Preoperative.AFP(>500ng/ml) | 115 (8, 2,524)             |
| BCLC.stage                  |                            |
| A                           | 68 (43%)                   |
| B                           | 52 (33%)                   |
| C                           | 39 (25%)                   |
| TNM.stage                   |                            |
| IA                          | 5 (3.1%)                   |
| IB                          | 86 (54%)                   |
| II                          | 14 (8.8%)                  |
| IIIA                        | 15 (9.4%)                  |
| IIIB                        | 37 (23%)                   |
| IVA                         | 2 (1.3%)                   |

<sup>a</sup> n (%); Median (IQR)

**Supplementary table2.The baseline clinical characteristics of CHCC cohort**

| <b>Characteristic</b> | <b>N = 203<sup>a</sup></b> |
|-----------------------|----------------------------|
| Gender(male)          | 153 (75%)                  |
| HBV(Positive)         | 57 (28%)                   |
| HCV(Positive)         | 121 (60%)                  |
| TNM4                  |                            |
| 1                     | 33 (16%)                   |
| 2                     | 96 (47%)                   |
| 3                     | 59 (29%)                   |
| 4                     | 15 (7.4%)                  |
| Vascular.invasion     |                            |
| 0                     | 140 (69%)                  |
| 1                     | 37 (18%)                   |
| 2                     | 13 (6.4%)                  |
| 3                     | 5 (2.5%)                   |
| 4                     | 6 (3.0%)                   |
| 5                     | 2 (1.0%)                   |

<sup>a</sup> n (%)

**Supplementary table3. Detailed information of included cohorts**

| <b>Cohort Name</b>         | <b>Tumor numb</b> | <b>Nomal numbe</b> | <b>Country</b> | <b>Year</b> | <b>Platform</b>                  |
|----------------------------|-------------------|--------------------|----------------|-------------|----------------------------------|
| <b>Bulk RNA-seq cohort</b> |                   |                    |                |             |                                  |
| CHCC                       | 159               | 159                | China          | 2019        | Illumina HiSeq X Ten             |
| ICGC-LIRI-JP               | 203               | 0                  | Japan          | 2016        | Illumina HiSeq<br>Illumina HiSeq |
| TCGA-LIHC                  | 370               | 50                 | USA            | 2017        | RNAseqV2                         |
| <b>ScRNA-seq cohort</b>    |                   |                    |                |             |                                  |
| GSE149614                  | 13                | 8                  | China          | 2020        | Illumina NovaSeq 6000            |

**Supplementary table4. siRNA sequences**

| <b>siRNA-negative control strand</b> |                  | <b>sequences</b>      |
|--------------------------------------|------------------|-----------------------|
| siRNA-negative control               | sense strand     | UUCUCCGAACGUGUCACGUTT |
| siRNA-negative control               | antisense strand | ACGUGACACGUUCGGAGAATT |
| CACNA1B-human-si2                    | sense strand     | GGAUCUUCAAGUCACGAATT  |
| CACNA1B-human-si2                    | antisense strand | UUCGUGACUUUGAAGAUCCTT |
| CACNA1B-human-si3                    | sense strand     | GUUCAGAUGCAGAGCAUAATT |
| CACNA1B-human-si3                    | antisense strand | UUAUGCUCUGCAUCUGAACTT |

**Supplementary table5. Primer sequences for qPCR**

---

| <b>Gene name</b> | <b>Sequence</b>           |
|------------------|---------------------------|
| CACNA1B-Forward  | GTGGGCTTTCCGAACACAAC      |
| CACNA1B-Forward  | GTTGTGTTCGGAAAGCCCAC      |
| GAPDH-Forward    | TGACATCAAGAAGGTGGTGAAGCAG |
| GAPDH-Rorward    | GTGTCGCTGTTGAAGTCAGAGGAG  |

---

**Supplementary table6. Antibody information**

| <b>Antibodies</b> | <b>Cat No</b> | <b>Manufacturer</b> | <b>Country</b> |
|-------------------|---------------|---------------------|----------------|
| Anti-CACNA1B      | 19681-1-AP    | Proteintech         | China          |
| Anti-GAPDH        | 60004-1-Ig    | Proteintech         | China          |
| Anti-N-cadherin   | 22018-1-AP    | Proteintech         | China          |
| Anti-Vimentin     | 10366-1-AP    | Proteintech         | China          |
| Anti-CDK2         | 10122-1-AP    | Proteintech         | China          |

**Supplementary table7. 132 differentially expressed calcium-related genes**

| <b>gene</b> | <b>logFC</b> | <b>logCPM</b> | <b>F</b> | <b>PValue</b> | <b>FDR</b> |
|-------------|--------------|---------------|----------|---------------|------------|
| CACNA1C     | 1.2414       | 1.3256        | 32.2874  | 2.47E-08      | 9.02E-08   |
| RYR2        | 2.2159       | 0.7487        | 21.8006  | 4.06E-06      | 1.06E-05   |
| CACNA1S     | 2.6717       | -2.5402       | 37.9805  | 1.66E-09      | 7.26E-09   |
| CACNA1E     | 3.1310       | -0.2464       | 27.7053  | 2.25E-07      | 7.08E-07   |
| CACNA1G     | 2.0619       | -2.6673       | 22.6346  | 2.69E-06      | 7.20E-06   |
| CACNB1      | 1.0755       | 0.1622        | 35.7363  | 4.79E-09      | 1.94E-08   |
| CACNA1I     | 3.3520       | 0.4948        | 30.5923  | 5.57E-08      | 1.93E-07   |
| CACNB3      | 1.1253       | 1.5128        | 36.7906  | 2.91E-09      | 1.22E-08   |
| CACNB4      | 3.1785       | -0.0114       | 54.8884  | 6.93E-13      | 5.14E-12   |
| CAMK2A      | 1.9453       | -0.2821       | 15.8999  | 7.86E-05      | 1.70E-04   |
| S100A6      | 1.1605       | 6.3632        | 16.3176  | 6.36E-05      | 1.40E-04   |
| CACNG1      | 4.8995       | -1.8557       | 43.9599  | 1.02E-10      | 5.34E-10   |
| CACNA2D3    | 2.1092       | -0.0282       | 26.2853  | 4.48E-07      | 1.35E-06   |
| KCNN3       | 1.5319       | 1.6951        | 72.8276  | 2.52E-16      | 3.05E-15   |
| CABP1       | 1.7306       | -1.5853       | 38.6781  | 1.20E-09      | 5.34E-09   |
| S100A8      | -1.0607      | 2.5888        | 11.5286  | 7.50E-04      | 1.40E-03   |
| FGF23       | -3.5798      | -2.1164       | 103.9953 | 5.42E-22      | 1.38E-20   |
| S100A1      | 1.6924       | -1.0509       | 43.0106  | 1.58E-10      | 8.09E-10   |
| KCNN1       | 2.5997       | -1.3079       | 45.2938  | 5.50E-11      | 2.99E-10   |
| SLC8A1      | -1.3005      | 1.6522        | 79.3218  | 1.55E-17      | 2.19E-16   |
| CAMK4       | -1.7133      | 0.5906        | 114.1830 | 9.06E-24      | 2.83E-22   |
| CAMK1G      | 1.8546       | -0.1311       | 15.7543  | 8.46E-05      | 1.83E-04   |
| CACNG4      | 4.0499       | 2.0824        | 35.7451  | 4.77E-09      | 1.94E-08   |
| CAMK2B      | -1.5828      | 2.3330        | 24.2734  | 1.20E-06      | 3.39E-06   |
| AGXT        | -1.1709      | 10.4737       | 28.9252  | 1.24E-07      | 4.09E-07   |
| KCNN2       | -3.4081      | 1.6849        | 166.4287 | 2.29E-32      | 2.38E-30   |
| S100A12     | -2.9384      | -1.8007       | 168.7319 | 9.96E-33      | 1.11E-30   |
| S100P       | 5.9448       | 5.9536        | 57.3961  | 2.24E-13      | 1.80E-12   |
| KCNMB3      | 1.3058       | 0.2171        | 35.9654  | 4.29E-09      | 1.76E-08   |
| CACNG8      | 1.3975       | -1.9834       | 25.1402  | 7.84E-07      | 2.28E-06   |
| CABYR       | 4.3188       | 2.1175        | 66.3006  | 4.33E-15      | 4.54E-14   |
| S100A10     | 1.2903       | 7.0782        | 53.5589  | 1.26E-12      | 8.99E-12   |
| CIB2        | 1.6369       | 1.0578        | 35.6431  | 5.00E-09      | 2.03E-08   |
| HRCT1       | 2.8889       | 3.1290        | 58.6341  | 1.29E-13      | 1.08E-12   |
| BGLAP       | 1.9392       | -1.9682       | 55.3130  | 5.72E-13      | 4.30E-12   |
| GRHPR       | -1.1564      | 8.5174        | 68.7350  | 1.49E-15      | 1.65E-14   |
| EGF         | 4.7337       | 0.3929        | 44.9874  | 6.33E-11      | 3.42E-10   |
| S100A3      | 1.9856       | -0.8849       | 30.9948  | 4.59E-08      | 1.61E-07   |
| ATP2A1      | 1.5957       | -0.2891       | 53.8721  | 1.10E-12      | 7.87E-12   |
| CASKIN1     | 3.5292       | -1.7644       | 51.3253  | 3.47E-12      | 2.28E-11   |
| ALB         | -1.8026      | 16.0359       | 99.4080  | 3.51E-21      | 7.95E-20   |
| PLA2G6      | 1.3830       | 3.7509        | 76.1905  | 5.91E-17      | 7.72E-16   |
| CALCA       | 4.0411       | 2.6278        | 29.3719  | 1.00E-07      | 3.34E-07   |
| NECAB1      | 1.0821       | 0.0253        | 11.9950  | 5.88E-04      | 1.11E-03   |
| CALB1       | 1.1777       | -0.9449       | 6.6227   | 1.04E-02      | 1.61E-02   |
| SPP1        | 4.3312       | 9.1533        | 52.6072  | 1.94E-12      | 1.34E-11   |
| S100A14     | 1.4115       | 4.7501        | 12.3257  | 4.94E-04      | 9.46E-04   |
| CAMK1G.1    | 1.8546       | -0.1311       | 15.7543  | 8.46E-05      | 1.83E-04   |
| SLC34A3     | 3.0498       | -2.4518       | 52.1401  | 2.40E-12      | 1.63E-11   |
| TACSTD2     | -1.5079      | 2.6257        | 20.1806  | 9.09E-06      | 2.25E-05   |
| CASQ1       | 1.6260       | -2.0644       | 23.4355  | 1.81E-06      | 4.98E-06   |
| PDGFRB      | 1.1782       | 5.9977        | 45.8663  | 4.22E-11      | 2.34E-10   |
| SCGN        | 2.1865       | 3.7242        | 25.8088  | 5.65E-07      | 1.68E-06   |

|         |         |         |          |          |          |
|---------|---------|---------|----------|----------|----------|
| CCBE1   | -3.5336 | 1.0460  | 178.1089 | 3.49E-34 | 4.55E-32 |
| CYP27B1 | 1.7385  | 0.1461  | 40.5288  | 5.02E-10 | 2.36E-09 |
| ALPL    | -1.5627 | 5.8482  | 44.7829  | 6.96E-11 | 3.73E-10 |
| CADPS   | 2.5107  | 0.3960  | 16.5420  | 5.67E-05 | 1.26E-04 |
| KCNH2   | 3.6458  | 1.5689  | 32.4563  | 2.28E-08 | 8.37E-08 |
| NECAB3  | 1.5105  | 5.4024  | 105.9498 | 2.46E-22 | 6.54E-21 |
| SLC8A2  | 1.9635  | -2.4236 | 22.1025  | 3.50E-06 | 9.21E-06 |
| CRACR2B | 1.3521  | 2.6340  | 23.7060  | 1.58E-06 | 4.40E-06 |
| CALB2   | 1.6807  | -1.9320 | 12.5656  | 4.37E-04 | 8.42E-04 |
| TRPC6   | 2.1482  | -0.2081 | 117.2261 | 2.71E-24 | 9.27E-23 |
| TRPC4   | 1.3401  | -0.3590 | 21.0378  | 5.93E-06 | 1.51E-05 |
| CAMK2N2 | 2.4366  | 2.2749  | 48.6614  | 1.17E-11 | 7.05E-11 |
| KCNU1   | 7.3907  | 1.7079  | 54.3780  | 8.72E-13 | 6.37E-12 |
| STX1A   | 1.6181  | 0.9477  | 87.5421  | 4.79E-19 | 8.31E-18 |
| SLC34A2 | 1.8879  | 4.0574  | 7.7165   | 5.71E-03 | 9.27E-03 |
| CLDN19  | 2.9287  | 0.2230  | 28.8135  | 1.31E-07 | 4.30E-07 |
| CABP7   | 2.2501  | -2.3112 | 41.4740  | 3.23E-10 | 1.58E-09 |
| UMODL1  | 1.3073  | -1.5079 | 6.9642   | 8.62E-03 | 1.35E-02 |
| TRPC3   | 1.8847  | -1.0371 | 13.7183  | 2.40E-04 | 4.83E-04 |
| CASQ2   | 1.4255  | 0.2828  | 25.6975  | 5.97E-07 | 1.76E-06 |
| ACE     | 1.0660  | 2.4285  | 40.0060  | 6.42E-10 | 2.97E-09 |
| PTH1R   | -3.2364 | 2.6055  | 292.1277 | 3.08E-50 | 4.52E-47 |
| TRPC5   | -1.0391 | -0.7927 | 9.4895   | 2.20E-03 | 3.82E-03 |
| PTHLH   | 2.2563  | 1.1777  | 18.6482  | 1.96E-05 | 4.62E-05 |
| ANO1    | -1.0751 | 5.9316  | 17.9049  | 2.85E-05 | 6.58E-05 |
| SYT1    | 1.0275  | 2.0529  | 6.8267   | 9.30E-03 | 1.45E-02 |
| REN     | 1.9930  | 1.2436  | 21.4745  | 4.77E-06 | 1.23E-05 |
| PVALB   | -3.6445 | -1.4901 | 205.1819 | 2.94E-38 | 7.91E-36 |
| PHEX    | 3.1753  | -0.2413 | 47.7417  | 1.78E-11 | 1.04E-10 |
| EFCAB12 | 1.1812  | 2.2273  | 15.5447  | 9.42E-05 | 2.01E-04 |
| HOGA1   | -1.7050 | 4.3517  | 70.8612  | 5.91E-16 | 6.86E-15 |
| C2CD4B  | -1.5001 | 0.1099  | 35.5196  | 5.30E-09 | 2.14E-08 |
| ITPR3   | 1.3204  | 3.3761  | 15.2537  | 1.09E-04 | 2.31E-04 |
| SCN5A   | 2.1393  | -2.1934 | 22.3400  | 3.11E-06 | 8.25E-06 |
| PLN     | 1.2797  | 0.8064  | 10.9935  | 9.93E-04 | 1.81E-03 |
| CYP3A4  | -1.6156 | 10.5962 | 13.1658  | 3.20E-04 | 6.29E-04 |
| TRPM6   | 1.0241  | -1.4110 | 7.7359   | 5.65E-03 | 9.18E-03 |
| ANXA2   | 1.2028  | 8.2658  | 59.2011  | 1.00E-13 | 8.53E-13 |
| FXYD2   | 2.1601  | 0.8776  | 16.5250  | 5.72E-05 | 1.27E-04 |
| EFCAB8  | 1.0921  | -2.9162 | 13.6297  | 2.52E-04 | 5.04E-04 |
| PLCG1   | 1.0215  | 5.0805  | 72.3183  | 3.14E-16 | 3.75E-15 |
| FOS     | -3.1051 | 6.9994  | 228.7876 | 1.14E-41 | 4.61E-39 |
| C2CD4D  | 1.4087  | -1.7020 | 33.3045  | 1.52E-08 | 5.72E-08 |
| NOX5    | 1.4407  | -2.5097 | 18.0401  | 2.66E-05 | 6.17E-05 |
| CRP     | -1.1402 | 11.2358 | 7.9112   | 5.14E-03 | 8.39E-03 |
| RET     | -2.1966 | 1.3684  | 46.8168  | 2.73E-11 | 1.55E-10 |
| C2CD6   | 1.4049  | -2.1325 | 20.2343  | 8.85E-06 | 2.20E-05 |
| KCNJ5   | 2.1683  | 2.4368  | 46.4641  | 3.21E-11 | 1.80E-10 |
| BSND    | 3.2351  | -2.5195 | 36.5867  | 3.20E-09 | 1.33E-08 |
| SYT2    | 2.1004  | -0.7793 | 25.7203  | 5.90E-07 | 1.75E-06 |
| ASPH    | 1.0037  | 7.4503  | 26.2677  | 4.52E-07 | 1.36E-06 |
| SPARCL1 | 2.8054  | 7.2006  | 54.1462  | 9.68E-13 | 7.01E-12 |
| TRPV4   | -1.2588 | 2.9998  | 24.0519  | 1.34E-06 | 3.76E-06 |
| IL6     | -1.9006 | -0.4772 | 41.1128  | 3.83E-10 | 1.85E-09 |
| KCNIP3  | 1.5791  | 1.8225  | 19.9780  | 1.01E-05 | 2.48E-05 |
| TNNC1   | 3.0928  | 1.4746  | 42.3708  | 2.13E-10 | 1.07E-09 |

|         |         |         |          |          |          |
|---------|---------|---------|----------|----------|----------|
| PKD1L1  | 1.1822  | -0.8114 | 22.3227  | 3.14E-06 | 8.32E-06 |
| PLA2G4C | 1.2818  | 4.1545  | 45.3309  | 5.41E-11 | 2.94E-10 |
| DMD     | -1.2553 | 5.2298  | 72.5954  | 2.79E-16 | 3.35E-15 |
| MGP     | 1.0971  | 4.6741  | 16.8351  | 4.89E-05 | 1.09E-04 |
| DNAH8   | 2.1448  | -1.8255 | 30.7138  | 5.25E-08 | 1.83E-07 |
| TNFSF11 | -1.1086 | 0.5561  | 14.3722  | 1.72E-04 | 3.53E-04 |
| ADCY8   | 3.1052  | 0.6152  | 17.6563  | 3.23E-05 | 7.40E-05 |
| PRKCB   | -1.1425 | 2.0672  | 36.3215  | 3.63E-09 | 1.50E-08 |
| CDKN3   | 3.9474  | 3.0061  | 219.5868 | 2.36E-40 | 8.10E-38 |
| GRIN2A  | 2.8021  | 0.2867  | 25.0766  | 8.09E-07 | 2.34E-06 |
| OXT     | -1.5853 | 0.6318  | 14.5039  | 1.60E-04 | 3.31E-04 |
| RGN     | -1.0479 | 7.3649  | 38.0151  | 1.63E-09 | 7.15E-09 |
| F9      | -1.8506 | 8.0868  | 47.5632  | 1.94E-11 | 1.13E-10 |
| F2RL3   | 2.3268  | 1.9808  | 54.5802  | 7.96E-13 | 5.84E-12 |
| CCL2    | -1.3585 | 4.0531  | 39.5044  | 8.11E-10 | 3.71E-09 |
| GRIN1   | 2.9596  | -2.1596 | 37.6234  | 1.96E-09 | 8.50E-09 |
| TP53I3  | 1.9099  | 4.5694  | 76.4036  | 5.40E-17 | 7.08E-16 |
| MYLK2   | 1.5730  | -2.2643 | 25.8318  | 5.59E-07 | 1.66E-06 |
| HDAC4   | 1.0125  | 3.1753  | 70.5985  | 6.63E-16 | 7.63E-15 |
| AIF1L   | 1.4203  | 3.3271  | 29.6046  | 8.96E-08 | 3.01E-07 |
| PPEF1   | 2.2649  | -2.2815 | 42.6813  | 1.84E-10 | 9.34E-10 |
| IGF1    | -1.1837 | 3.0308  | 21.7854  | 4.09E-06 | 1.07E-05 |
| GATA3   | -1.2959 | 0.6950  | 38.0656  | 1.59E-09 | 6.99E-09 |

---

**Supplementary table8. The relationship between the CPRS and clinical characteristics in HCC patients**

| Characteristic           | Overall, N = 368 <sup>a</sup> | High-risk, N = 184 <sup>a</sup> | Low-risk, N = 184 <sup>a</sup> | p-value <sup>b</sup> |
|--------------------------|-------------------------------|---------------------------------|--------------------------------|----------------------|
| age (>median)            | 191 (52%)                     | 97 (53%)                        | 94 (51%)                       | 0.8                  |
| gender(male)             | 248 (67%)                     | 121 (66%)                       | 127 (69%)                      | 0.5                  |
| Alcohol.consumption(Yes) | 117 (32%)                     | 66 (36%)                        | 51 (28%)                       | 0.093                |
| Family.history (Yes)     | 111 (30%)                     | 55 (30%)                        | 56 (30%)                       | 0.7                  |
| HBV (Positive)           | 104 (28%)                     | 36 (20%)                        | 68 (37%)                       | <0.001               |
| HCV (Positive)           | 56 (15%)                      | 30 (16%)                        | 26 (14%)                       | 0.6                  |
| AFP(>500ng/ml)           | 65 (24%)                      | 30 (24%)                        | 35 (24%)                       | >0.9                 |
| Vascular.invasion (Yes)  | 108 (35%)                     | 64 (43%)                        | 44 (27%)                       | 0.002                |
| Histologic.grade (G3-G4) | 134 (37%)                     | 77 (42%)                        | 57 (32%)                       | 0.04                 |
| TNM (III-IV)             | 92 (27%)                      | 58 (34%)                        | 34 (20%)                       | 0.002                |
| OS(dead)                 | 130 (35%)                     | 86 (47%)                        | 44 (24%)                       | <0.001               |
| PFS (Yes)                | 210 (57%)                     | 120 (66%)                       | 90 (49%)                       | 0.002                |
| CSN1S1                   | 0.02 (1.07)                   | 0.20 (1.47)                     | -0.15 (0.26)                   | 0.066                |
| S100A9                   | -0.03 (1.04)                  | 0.59 (1.03)                     | -0.65 (0.58)                   | <0.001               |
| CACNA1B                  | 0.03 (1.07)                   | 0.17 (1.49)                     | -0.12 (0.18)                   | <0.001               |
| FKBP1A                   | 0.19 (0.90)                   | 0.68 (0.80)                     | -0.30 (0.70)                   | <0.001               |
| SLC25A24                 | 0.03 (1.05)                   | 0.50 (1.17)                     | -0.43 (0.65)                   | <0.001               |
| SPP1                     | 0.09 (1.03)                   | 0.82 (0.72)                     | -0.65 (0.72)                   | <0.001               |

<sup>a</sup> n (%); Mean (SD)

<sup>b</sup> Pearson's Chi-squared test; Wilcoxon rank sum test

**Supplementary table9. The result of Gene Set Variation Analysis**

| <b>TCGA</b>                   | <b>logFC</b> | <b>AveExpr</b> | <b>t</b> | <b>P.Value</b> | <b>adj.P.Val</b> | <b>B</b> |
|-------------------------------|--------------|----------------|----------|----------------|------------------|----------|
| HALLMARK_ALLOGRAFT_REJECTION  | 0.2357       | -0.0103        | 6.5642   | 1.75E-10       | 1.10E-09         | 12.8947  |
| HALLMARK_COMPLEMENT           | 0.1398       | -0.0066        | 6.2390   | 1.20E-09       | 4.83E-09         | 11.0205  |
| HALLMARK_P53_PATHWAY          | 0.0990       | -0.0225        | 6.2304   | 1.26E-09       | 4.83E-09         | 10.9717  |
| HALLMARK_MYC_TARGETS_V1       | 0.2246       | -0.0304        | 6.1241   | 2.31E-09       | 7.71E-09         | 10.3767  |
| HALLMARK_APOPTOSIS            | 0.1089       | -0.0167        | 5.6735   | 2.81E-08       | 8.78E-08         | 7.9475   |
| HALLMARK_KRAS_SIGNALING_DN    | -0.1309      | 0.0381         | -7.2583  | 2.29E-12       | 2.87E-11         | 17.1432  |
| HALLMARK_BILE_ACID_METABOLISM | -0.4188      | 0.0220         | -12.1042 | 1.12E-28       | 5.62E-27         | 54.2505  |

| <b>ICGC</b>                   | <b>logFC</b> | <b>AveExpr</b> | <b>t</b> | <b>P.Value</b> | <b>adj.P.Val</b> | <b>B</b> |
|-------------------------------|--------------|----------------|----------|----------------|------------------|----------|
| HALLMARK_APOPTOSIS            | 0.1470       | -0.0164        | 5.3723   | 2.08E-07       | 2.60E-06         | 6.4787   |
| HALLMARK_COMPLEMENT           | 0.1551       | -0.0074        | 4.7484   | 3.82E-06       | 2.12E-05         | 3.6833   |
| HALLMARK_ALLOGRAFT_REJECTION  | 0.2017       | -0.0053        | 4.1526   | 4.80E-05       | 0.00016199       | 1.2749   |
| HALLMARK_MYC_TARGETS_V1       | 0.2256       | -0.0349        | 4.1496   | 4.86E-05       | 0.00016199       | 1.2636   |
| HALLMARK_P53_PATHWAY          | 0.0911       | -0.0285        | 4.1134   | 5.62E-05       | 0.00017568       | 1.1259   |
| HALLMARK_KRAS_SIGNALING_DN    | -0.1379      | 0.0260         | -7.2203  | 9.67E-12       | 2.42E-10         | 16.1668  |
| HALLMARK_BILE_ACID_METABOLISM | -0.3441      | 0.0013         | -7.2822  | 6.71E-12       | 2.42E-10         | 16.5224  |

| <b>CHCC</b>                   | <b>logFC</b> | <b>AveExpr</b> | <b>t</b> | <b>P.Value</b> | <b>adj.P.Val</b> | <b>B</b> |
|-------------------------------|--------------|----------------|----------|----------------|------------------|----------|
| HALLMARK_BILE_ACID_METABOLISM | -0.2535      | -0.0089        | -4.5713  | 9.48E-06       | 7.90E-05         | 2.9604   |
| HALLMARK_KRAS_SIGNALING_DN    | -0.0953      | 0.0082         | -4.0443  | 8.05E-05       | 0.00044723       | 0.9355   |
| HALLMARK_APOPTOSIS            | 0.1260       | -0.0360        | 4.0106   | 9.17E-05       | 0.00045848       | 0.8129   |
| HALLMARK_ALLOGRAFT_REJECTION  | 0.2718       | -0.0289        | 5.2556   | 4.52E-07       | 5.65E-06         | 5.8684   |
| HALLMARK_MYC_TARGETS_V1       | 0.3157       | -0.0278        | 5.4115   | 2.17E-07       | 3.62E-06         | 6.5719   |
| HALLMARK_COMPLEMENT           | 0.1827       | -0.0350        | 5.7474   | 4.29E-08       | 1.07E-06         | 8.1350   |
| HALLMARK_P53_PATHWAY          | 0.1500       | -0.0327        | 6.1970   | 4.46E-09       | 2.23E-07         | 10.3227  |

## Supplementary Box1.392 calcium-related genes

| Gene symbol |         |           |           |          |          |          |          |        |
|-------------|---------|-----------|-----------|----------|----------|----------|----------|--------|
| CACNA1C     | CALHM1  | CALHM2    | GRM1      | KCNMB1   | SLC24A1  | PDGFB    | CABYRP1  | UMOD   |
| ORAI1       | EGF     | RCVRN     | TRPM2     | CACNG2   | GALNT3   | PHEX     | DNAH8    | FOS    |
| CACNA1A     | MEN1    | RRAD      | PSEN1     | LOC10013 | CABP4    | EFCAB12  | TNFSF11  | CAMKK1 |
| CACNA1B     | S100A3  | TRPC3     | GUCA1A    | SLC8A1   | MCUB     | CAPN1    | CPNE6    | NOX5   |
| RYR2        | ATP2A1  | PTK2B     | LOC106736 | GNA11    | CYP27B1  | HOGA1    | S100A7P1 | RCN2   |
| CACNA1D     | CASK    | CACFD1    | SDF4      | CAMKK2   | CABP2    | EFCAB3   | ALPP     | PKD2L1 |
| TRPV6       | ATP2A3  | CASQ2     | CRP       | PRKAR1A  | CLCN5    | SLC25A13 | SLC25A23 | C2CD4D |
| CACNB2      | SLC8B1  | SARAF     | CALHM4    | CALM1    | MCUR1    | C2CD4B   | CETN2    | CAPN3  |
| CACNA1S     | SLC34A1 | C2CD5     | CALHM5    | MICU2    | ALPL     | ITPR3    | CDH23    |        |
| CAMK2G      | ALB     | ATP2B3    | ELN       | CAMK4    | CALM3    | CLCA2    | ADCY8    |        |
| CACNA1E     | PLA2G6  | ACE       | KCNQ1-AS  | CAMK1    | SRI      | TRPM4    | MAPK3    |        |
| ANKH        | SLC24A3 | DSP       | RET       | CAMK2D   | CALM2    | TRPM7    | MAPK10   |        |
| CACNA1H     | ENPP1   | PTH1R     | C2CD6     | ORAI2    | CHERP    | NR1I3    | ANXA11   |        |
| CACNA1G     | CAMK1D  | CLCA1     | MYORG     | KCNMB4   | HSPG2    | C2CD4A   | PLA2G2A  |        |
| KCNMA1      | CALCA   | CDH1      | TANGO2    | CACNG4   | CADPS    | KNG1     | PRKCB    |        |
| CACNA1F     | RYR3    | TRPC5     | KCNJ5     | ADCY10   | SLC24A2  | SCN5A    | CDKN3    |        |
| CACNA2D1    | CRACR2A | PTHLH     | TPCN2     | ORAI3    | HPCA     | PLN      | GRIN2A   |        |
| RYR1        | NECAB1  | ANO1      | BSND      | CAMK2B   | KCNH2    | CAB39L   | FKBP1A   |        |
| CACNB1      | S100A16 | ANXA6     | CFTR      | AGXT     | CCAL1    | EFCAB13  | OXT      |        |
| S100B       | CALB1   | SYT1      | C2CD2     | TNFRSF1  | CADPS2   | CYP3A4   | RGN      |        |
| CACNA1I     | SPP1    | RASGRP1   | CPNE1     | ATP2A2   | ATP2B2   | TRPM6    | F9       |        |
| CACNB3      | ATP2B4  | SLC12A3   | SYT2      | KCNN2    | CABS1    | CD36     | CAV1     |        |
| PTH         | S100A14 | EFCAB11   | GSN       | S100A12  | NECAB3   | ITPR2    | SLC25A25 |        |
| CACNB4      | NECAB2  | EDN1      | ASPH      | S100P    | SMOC2    | ANXA2    | CASKP1   |        |
| CACNA2D2    | PLA2G4A | CAB39     | TRPC7     | CACNG6   | SLC8A2   | JAM2     | PPP3CA   |        |
| KCNN4       | KCNQ1   | NOS3      | STIM2     | CACNG7   | CRACR2B  | SLC25A12 | CATSPER1 |        |
| CAMK2A      | TRPV5   | CAMK2N1   | SPARC     | GNAS     | CIB4     | CALCOCO1 | EEF2K    |        |
| CIB1        | S100A5  | LRP2      | TRPV4     | KCNMB3   | SLC20A2  | FBN1     | F2       |        |
| NCS1        | CAMK1G  | GCA       | RCN1      | CACNG8   | CALCOCO1 | FXRD     | ATP2C2   |        |
| MICU1       | MICU3   | EFCAB7    | CAST      | CACNG3   | CALB2    | XPR1     | TPCN1    |        |
| S100A6      | S100Z   | PRKCA     | IL6       | S100A7   | TRPC6    | CXADR    | F10      |        |
| STIM1       | CYP24A1 | CALHM3    | KCNIP3    | CACNG5   | CIB3     | CREB1    | CCL2     |        |
| CACNG1      | PDCD6   | SLC24A5   | CDH2      | GCM2     | TRPC4    | EFCAB8   | GNAQ     |        |
| CACNA2D3    | CABP5   | CAPN2     | S100A7P2  | CAMLG    | FAM20A   | C2CD4C   | GRIN1    |        |
| S100A4      | SLC8A3  | LOC108663 | TNNC1     | S100A11  | RASGRP2  | AMBP     | TP53     |        |
| S100A9      | SLC34A3 | CABCOCOP  | PKD1      | CABYR    | CARHSP1  | PKP2     | TGM2     |        |
| KCNN3       | SMOC1   | EFCAB6    | CSN1S1    | CANT1    | CAPNS1   | SLC25A24 | MYLK     |        |
| SLC26A1     | CARF    | REN       | CLCA4     | KCNMB2   | CAMK2N2  | INS      | HDAC4    |        |
| CABP1       | TACSTD2 | DSPP      | VSNL1     | S100A10  | KCNU1    | PNPLA8   | AIF1     |        |
| VDR         | S100A7A | EFCAB14   | TMEM37    | ATP2B1   | STX1A    | PKD2     | BEST1    |        |
| S100A8      | CASQ1   | ANXA5     | LBR       | S100A2   | SLC34A2  | HPCAL1   | GRIN2B   |        |
| FGF23       | PDGFRB  | EFCAB2    | PLA2G4C   | CIB2     | SLC24A4  | PLCG1    | PPEF1    |        |
| S100A1      | SCGN    | KRIT1     | DMD       | KL       | CLDN19   | CALHM6   | DOC2B    |        |
| MCU         | AP2S1   | S100A7L2  | NOS1      | HRC      | CALR     | TRPV1    | NAGLU    |        |
| KCNN1       | TRPC1   | CHP1      | MGP       | BGLAP    | MAPK1    | CLCNKB   | IGF1     |        |
| S100G       | CCBE1   | EFCAB5    | CCND1     | ITPR1    | CABP7    | TNF      | PIK3C2A  |        |
| OTULIN      | CDC73   | PVALB     | AIRE      | S100A13  | EFCAB9   | CYP2R1   | GATA3    |        |
| CACNA2D4    | CLDN16  | EFCAB10   | PRKCE     | GRHPR    | ATP2C1   | ANXA1    | ABCC6    |        |

# Source data of Figure8

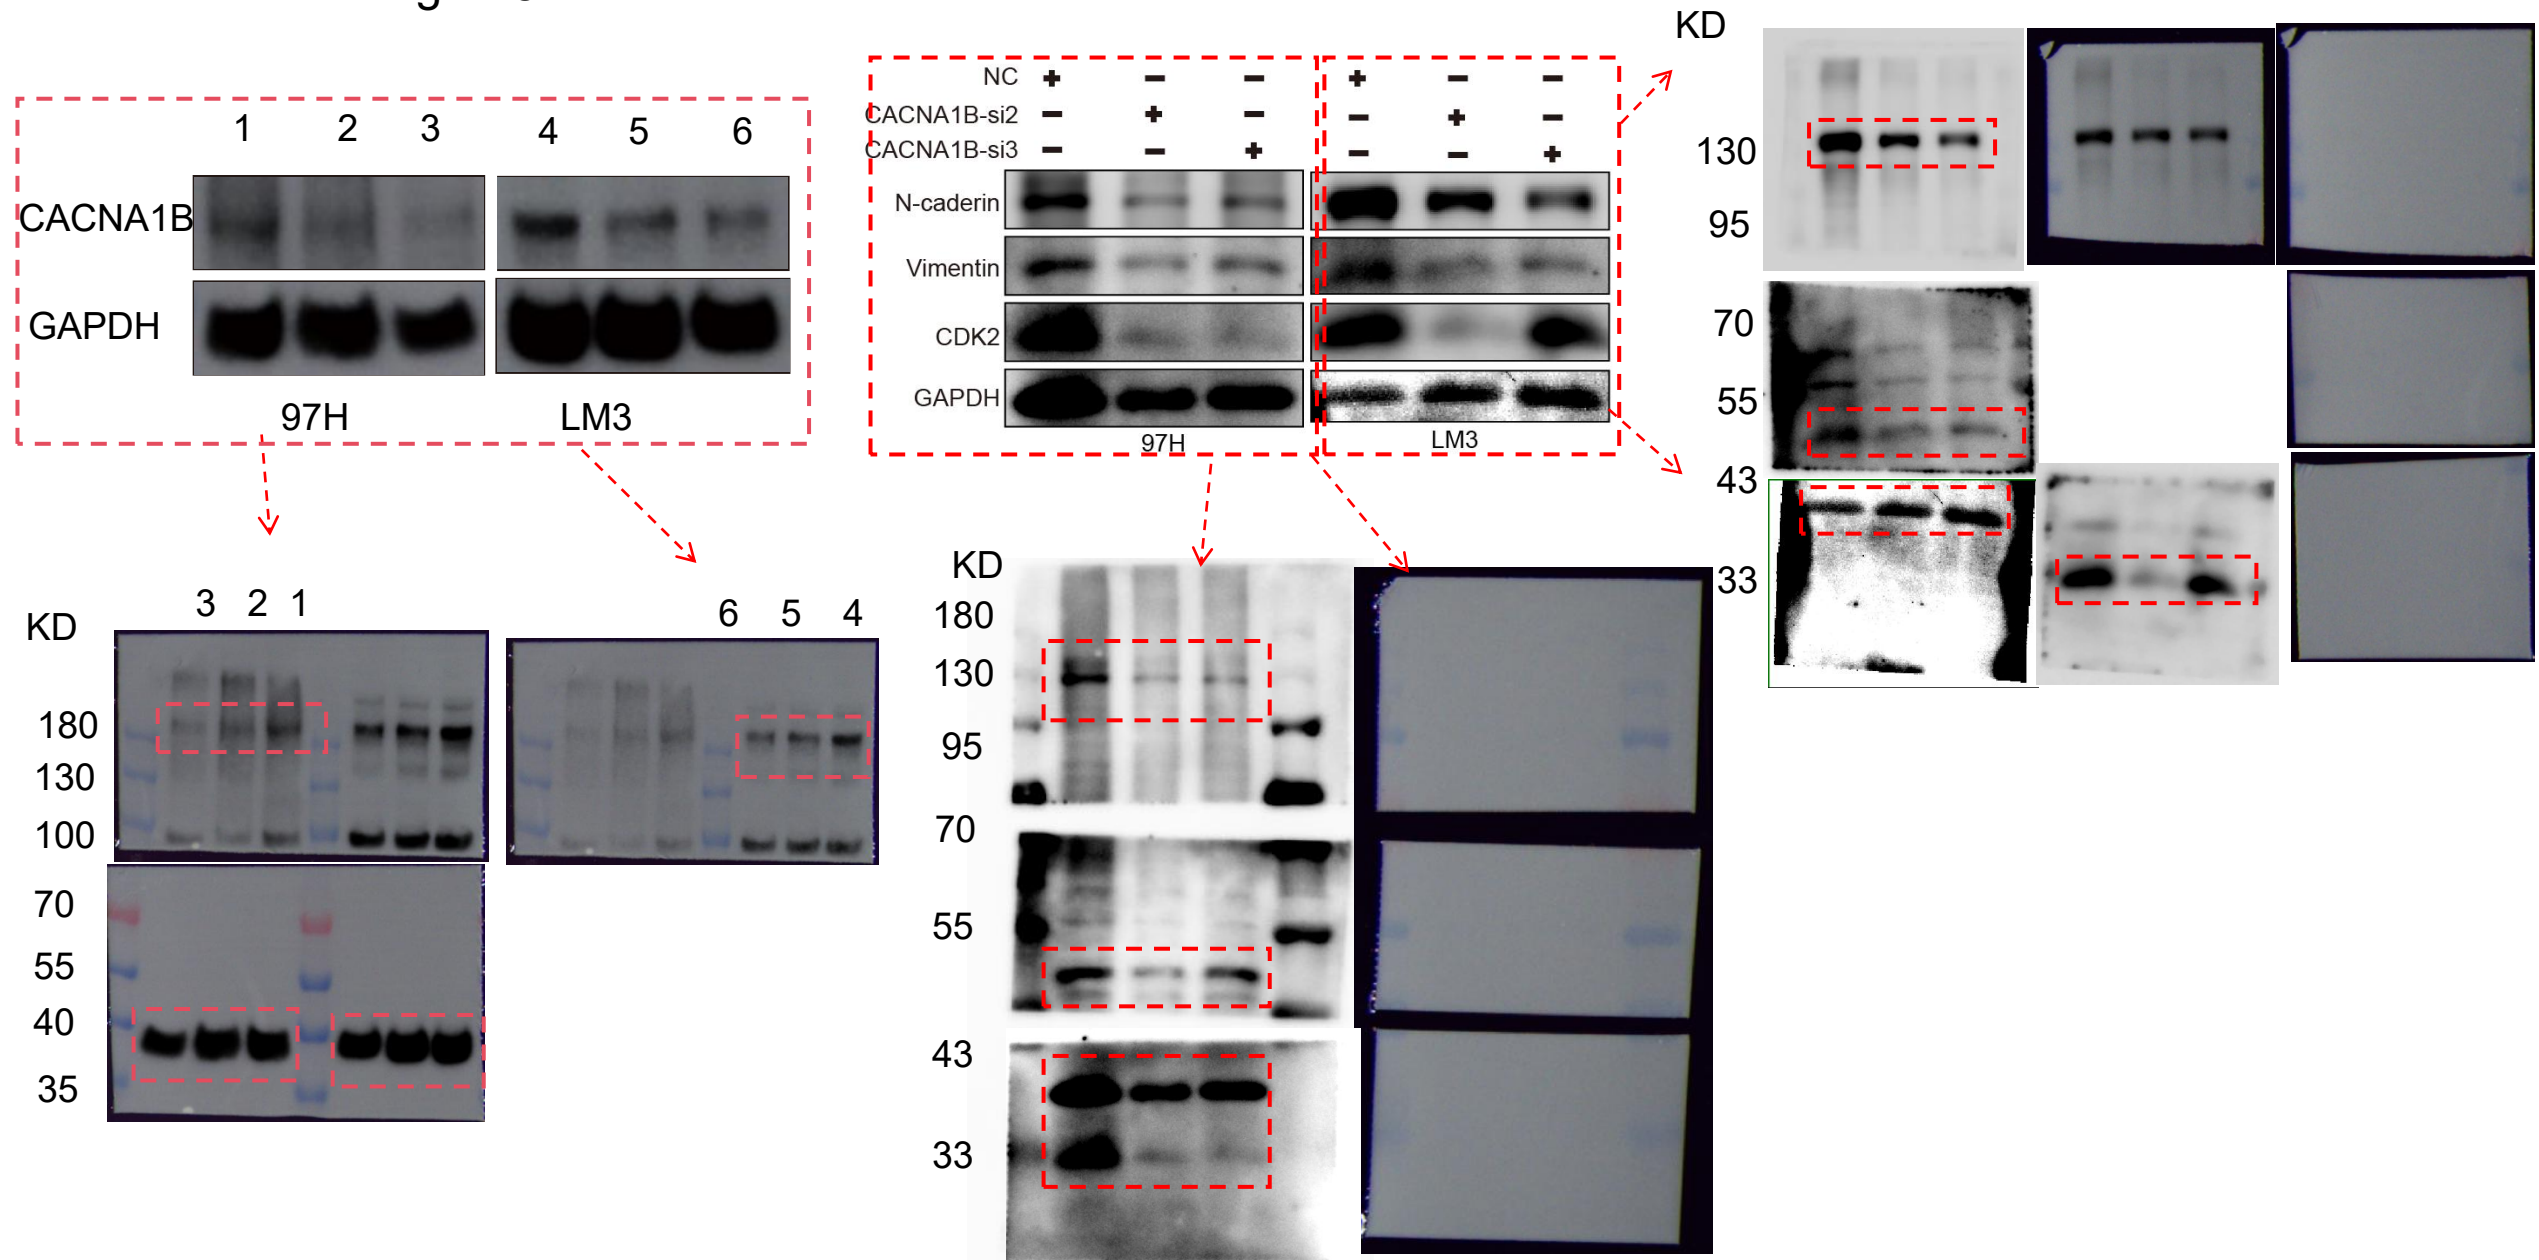

Source data : Source gel images for Figure8C and 8K. The red rectangles show the cropping location.
